# Supplementary material for: Functional roles of the pre-sensor I insertion sequence in an AAA+ bacterial enhancer binding protein
Source: PubMed Central journal article supplement (PMC2745333; doi:10.1111/j.1365-2958.2009.06744.x), 2009-06-23

1 **Supplementary Information**

2

3 **Supplementary Table 1: Crystallographic data and refinement statistics of the**

4 **PspF<sub>1-275</sub>R131A structure**

5

---

|               |                                                  |
|---------------|--------------------------------------------------|
| Space group   | P6 <sub>5</sub>                                  |
| Unit Cell (Å) | a = b = 113.8, c = 39.4<br>α = β = 90°, γ = 120° |

---

A. *Data reduction statistics*

---

| λ (Å)   | Resolution (Å)                | Unique reflections | Redundancy | I / σ         | Completeness (%) | Rsym <sup>a</sup> (%) |
|---------|-------------------------------|--------------------|------------|---------------|------------------|-----------------------|
| 1.54179 | 32.86 – 2.21<br>(2.33 – 2.21) | 14918              | 9.7        | 29.9<br>(8.2) | 99.9             | 6.2<br>(25.8)         |

---

B. *Refinement Statistics*

---

|                         |                            |
|-------------------------|----------------------------|
| Reflections (work/free) | 14134/767                  |
| Number of atoms         | 2050 (135 water molecules) |
| R <sub>work</sub> (%)   | 17.3                       |
| R <sub>free</sub> (%)   | 23.5                       |

---

Ramachandran plot (%)

---

|            |      |
|------------|------|
| Favoured   | 95.7 |
| Generous   | 0.5  |
| Disallowed | 0    |

---

rms deviation from real values

---

|                    |       |
|--------------------|-------|
| Bond Lengths (Å)   | 0.019 |
| Bond angles (deg.) | 1.7   |

---

6 <sup>a</sup>Rsym =  $\sum |I_i - \langle I \rangle| / \sum \langle I \rangle$ , where I<sub>i</sub> and  $\langle I \rangle$  are the observed and averaged intensities.

7 The numbers in brackets are for the highest resolution shell.

8

9 **Supplementary Figure Legends**

10

11 **Supplementary Fig. 1: Nucleotide binding using UV-crosslinking of [ $\alpha$ -<sup>32</sup>P]ATP to**  
12 **PspF<sub>1-275</sub> proteins.**

13 Following UV irradiation of 20  $\mu$ M PspF<sub>1-275</sub> proteins in the presence of 40  $\mu$ Ci [ $\alpha$ -<sup>32</sup>P] ,  
14 and SDS-PAGE analysis, PspF<sub>1-275</sub> bands of equal Coomassie-blue intensities containing  
15 covalently cross-linked radioactivity were quantified by phosphorImager analysis and  
16 expressed in photo-stimulated luminescence. The variants are as indicated. The negative  
17 control refers to the Walker B mutation PspF<sub>1-275</sub>K42A, which is proposed to be  
18 monomeric and as such unable to interact with nucleotide (Schumacher *et al.*, 2004). Here  
19 “-“ represents the absence of protein.

20

21 **Supplementary Fig. 2: The pre-SIi variants V132A and L138A are defective in the**  
22 **presence of the ATP ground state analogues, AMP-AIF and ADP-BeF. A) SDS-**

23 PAGE gel showing the cross-linking profiles of  $\sigma^{54}$ -DNA complexes formed on the  
24 mismatch promoter probe in the presence of *in situ* generated AMP-AIF (see  
25 Experimental Procedures). The migration positions of the cross-linked  $\sigma^{54}$ -DNA and  
26 PspF<sub>1-275</sub>-DNA species are indicated. Cross-linked PspF<sub>1-275</sub>-DNA species are no longer  
27 observed in reactions containing V132A and L138A. Native-PAGE gel illustrating that  
28 AMP-AIF-dependent trapped complexes are only observed in the presence of PspF<sub>1-275</sub>  
29 WT (lane 2) and the pre-SIi variants S135A (lane 6), Q136A (lane 7) and P137A/T (lanes  
30 8-9). The migration positions of the  $\sigma^{54}$ -DNA-PspF<sub>1-275</sub>:AMP-AIF (trapped) complex,  
31 binary  $\sigma^{54}$ -DNA ( $\sigma^{54}$ -DNA) complex, free DNA and percentage DNA bound in each of

32 the complexes is indicated. **B)** SDS-PAGE gel as in **A)** but on the duplex promoter probe  
33 in the presence of core RNAP. The migration positions of the cross-linked  $\beta/\beta'$ -DNA,  $\sigma^{54}$ -  
34 DNA and PspF<sub>1-275</sub>-DNA species are indicated. **C)** SDS-PAGE gel showing the cross-  
35 linking profiles of  $\sigma^{54}$ -DNA complexes formed on the mismatch promoter probe in the  
36 presence of *in situ* generated ADP-BeF. The migration positions of the cross-linked  $\sigma^{54}$ -  
37 DNA and PspF<sub>1-275</sub>-DNA species are indicated.

38

39 **Supplementary Fig. 3: The pre-Sli variant S135A is affected by the slowly**  
40 **hydrolysable ATP analogue, ATP $\gamma$ S.** **A)** SDS-PAGE gel showing the cross-linking  
41 profiles of  $\sigma^{54}$ -DNA complexes formed on the mismatch promoter probe in the presence  
42 of ATP $\gamma$ S. The migration positions of the cross-linked  $\sigma^{54}$ -DNA and PspF<sub>1-275</sub>-DNA  
43 species are indicated. Cross-linked PspF<sub>1-275</sub>-DNA species are no longer observed in  
44 reactions containing S135A. Native-PAGE gel illustrating that the ATP $\gamma$ S-dependent  
45 complex ( $\sigma^{54}$ -DNA-PspF<sub>1-275</sub>:ATP $\gamma$ S) formed is unstable and only presence in reactions  
46 containing PspF<sub>1-275</sub> WT (lane 2) and the pre-Sli variants P137A/T (lanes 8-9). The  
47 migration positions of the  $\sigma^{54}$ -DNA-PspF<sub>1-275</sub>:ATP $\gamma$ S complex, binary  $\sigma^{54}$ -DNA ( $\sigma^{54}$ -  
48 DNA) complex, free DNA and percentage DNA bound in each of the complexes is  
49 indicated. **B)** SDS-PAGE gel as in **A)** but on the duplex promoter probe in the presence  
50 of core RNAP. The migration positions of the cross-linked  $\beta/\beta'$ -DNA,  $\sigma^{54}$ -DNA and  
51 PspF<sub>1-275</sub>-DNA species are indicated.

52

53 **Supplementary Fig. 4: A conserved switch between the pre-Sli and L1 loops exists**  
54 **within bEBPs.** The co-variance between the pre-Sli consensus sequence (RVGGNKPIK)

55 and each of the residues that constitute the AAA+ domain of bEBPs (Pfam 00158) was  
56 calculated. The correlation between each of the consensus sequence residues (colour-  
57 coded as shown) and each residue of the AAA+ domain is depicted graphically.

58

59 **Supplementary Fig. 5: Crystal structure of the PspF<sub>1-275</sub>R131A variant.** **A)**

60 Interaction between L1 loop residue E81 and the pre-Sli R131 residue (side chains shown  
61 as sticks) is disrupted in the R131A structure and the main chain of R131A rotates away  
62 from the L1 loop. Structural features relevant to bEBPs such as the L1 loop, the pre-Sli  
63 loop, Helix 3 and Helix 4 and the two sub-domains of the AAA+ domain are indicated.

64 **B)** Final 2F<sub>o</sub>-F<sub>c</sub> map of the pre-Sli region displayed at 1σ in blue mesh at 2.21Å. Inside  
65 the electron density map is the C<sub>α</sub> trace model, with the position of R131A indicated.  
66 Water molecules (red spheres) added towards later stages of refinement are also visible.

67 **C)** The pre-Sli loop within a simulated annealing omit F<sub>o</sub>-F<sub>c</sub> map contoured at 3σ, with  
68 residues 129-130 omitted. **D)** Comparison of main-chain RMSD values between PspF<sub>1-  
69 275</sub>WT and PspF<sub>1-275</sub>R131A. The peak represents residues 130-132, which in the context  
70 of PspF<sub>1-275</sub>R131A undergo the most dramatic change (with respect to PspF<sub>1-275</sub>WT). The  
71 missing residues in the graph refer to the non-defined L1 loop residues (82-89), which are  
72 absent in the crystal structure due to the flexibility of the L1 loop (also see Fig. 1A).

73

74 **References:**

75 Schumacher, J., Zhang, X., Jones, S., Bordes, P., and Buck, M. (2004) ATP-dependent  
76 transcriptional activation by bacterial PspF AAA+protein. *J Mol Biol* **338**: 863-  
77 875.

78

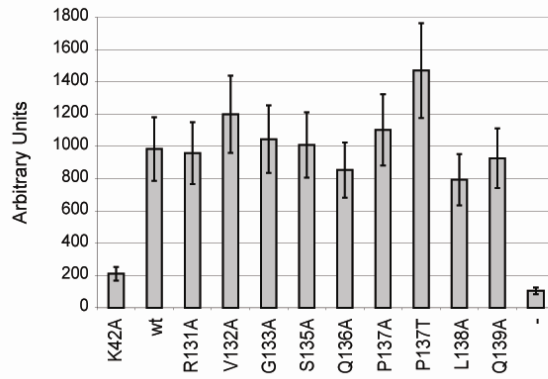



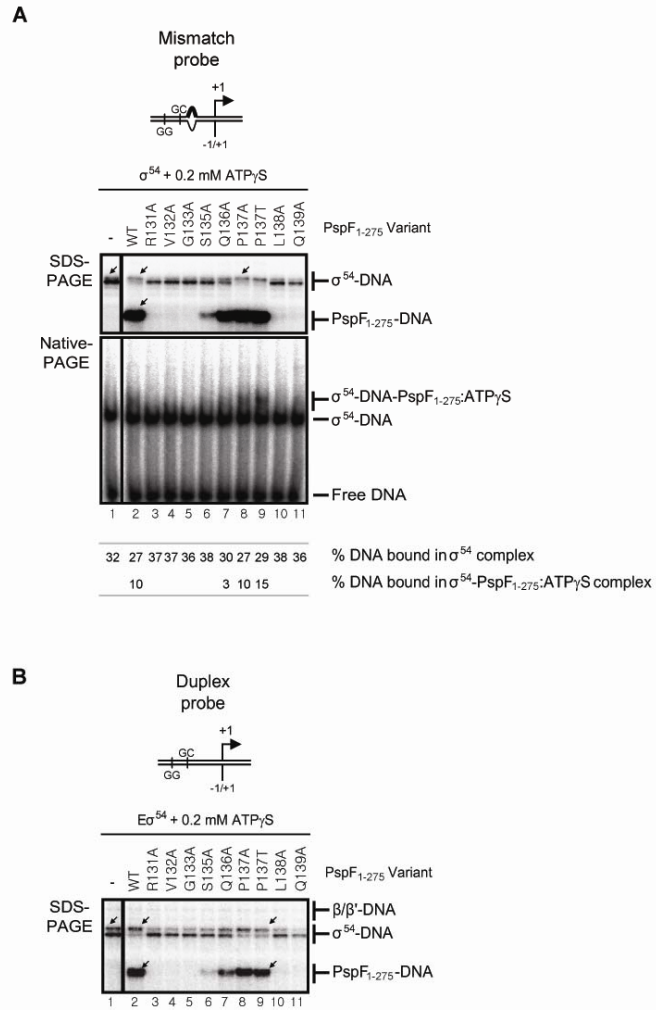

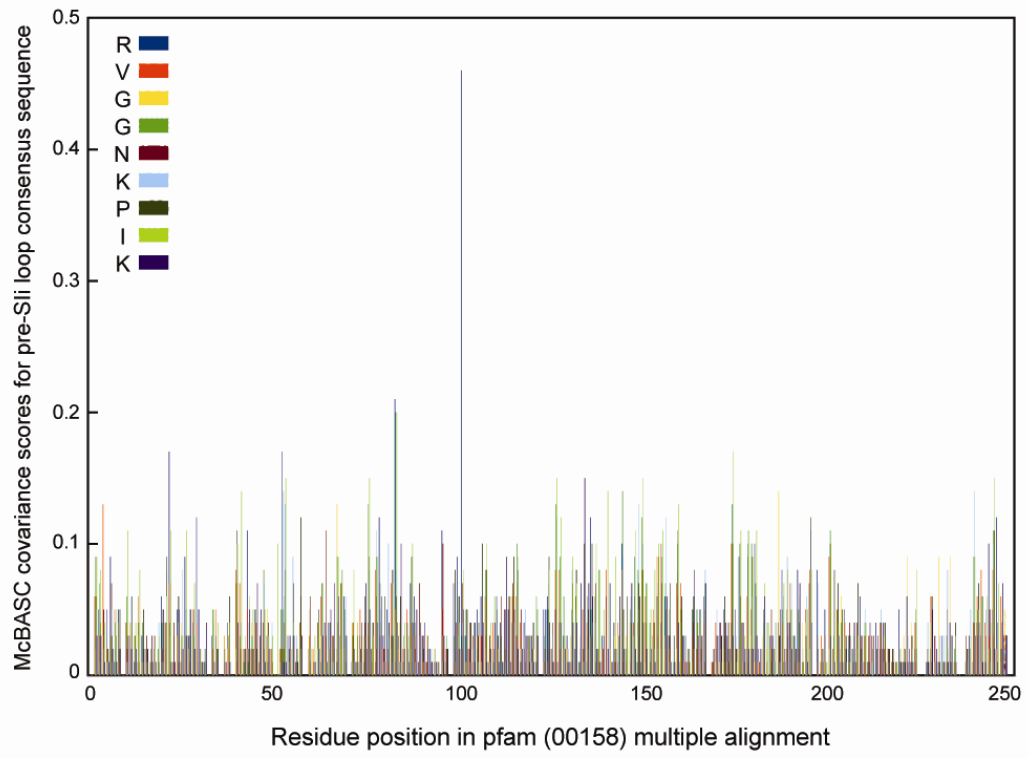

82



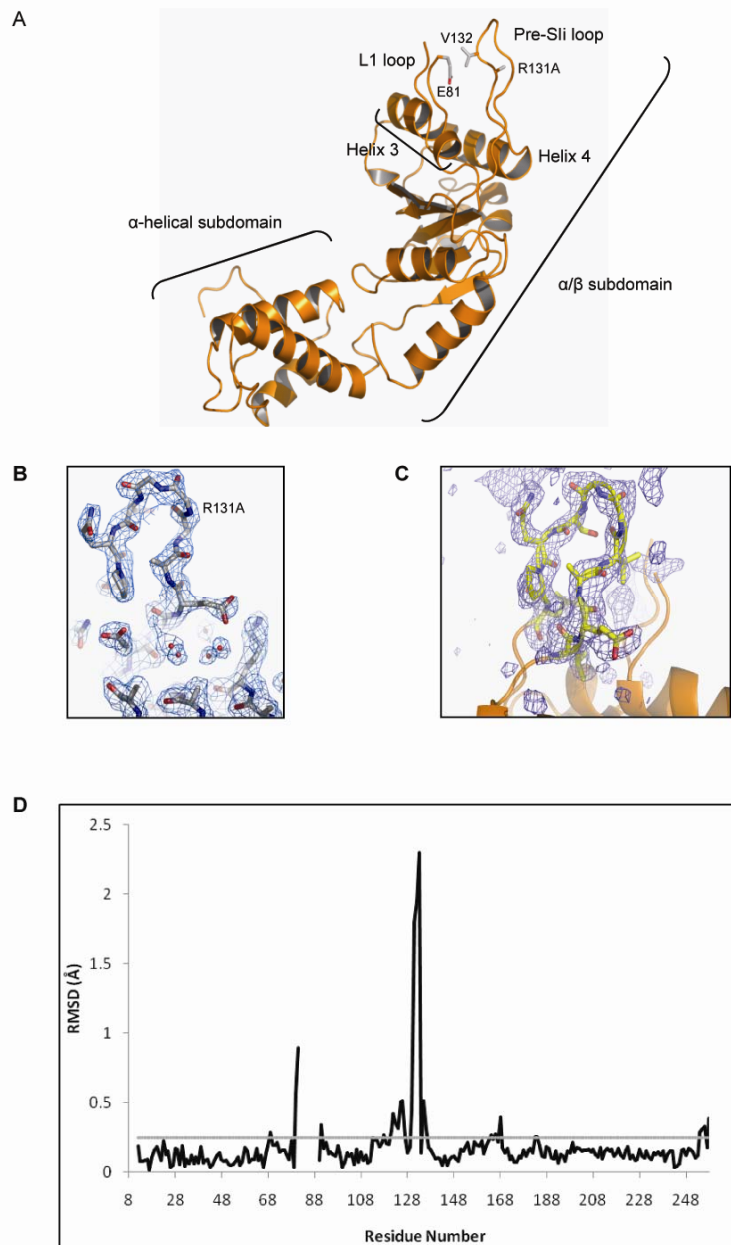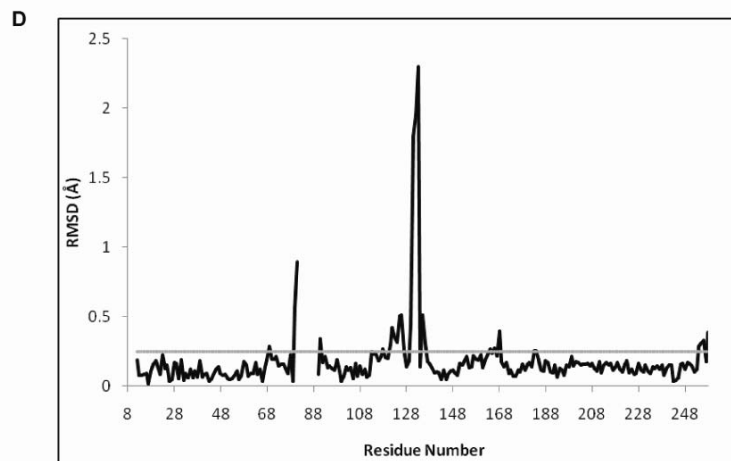

Supplement: NIHMS143329-supplement-supplement.pdf [file NIHMS143329-supplement-supplement.pdf]
